# Supplementary material for: Dendritic platinum-decorated gold nanoparticles for non-enzymatic glucose biosensing
Source: Royal Society of Chemistry journal article supplement (doi:10.1039/c3tb20903b), 2013-01-01
Supplement: c3tb20903b.pdf [file c3tb20903b.pdf]

# Supplementary Information

## Dendritic platinum-decorated gold nanoparticles for non-enzymatic glucose biosensing

Kuan-Jung Chen,<sup>a</sup> Wei-Nien Su,<sup>b</sup> Chun-Jern Pan,<sup>a</sup> Shou-Yi Cheng,<sup>a</sup> John Rick,<sup>a</sup> Shih-Han Wang,<sup>c</sup> Chung-Chiun Liu,<sup>d</sup> Chun-Chao Chang,<sup>e,\*</sup> Yaw-Wen Yang,<sup>f</sup> Chia-Hsin Wang,<sup>f</sup> Bing-Joe Hwang,<sup>a,f,\*</sup>

<sup>a</sup>Nanoelectrochemistry Laboratory, Department of Chemical Engineering, National Taiwan University of Science and Technology, Taipei 106, Taiwan

<sup>b</sup>NanoElectrochemistry Laboratory, Graduate Institute of Applied Science and Technology, National Taiwan University of Science and technology, Taipei 106, Taiwan

<sup>c</sup>Department of Chemical Engineering, I-Shou University, Kaohsiung County 84001, Taiwan, <sup>d</sup>Department of Chemical Engineering and Electronics Design Center, Case Western Reserve University, 10900 Euclid Avenue, OH44106, USA

<sup>e</sup>Taipei Medical University, Taipei 250, Taiwan, R. O. C.

<sup>f</sup>National Synchrotron Radiation Research Center, Hsinchu 30076, Taiwan

---

\* Corresponding authors:

(1) Bing-Joe Hwang: Fax: +886-2-27376644 ; E-mail:bjh@mail.ntust.edu.tw; National Taiwan University of Science and Technology and (2) Chun-Chao Chang: Fax: +886-2-27363051; E-mail: chunchao@tmu.edu.tw; Taipei Medical University

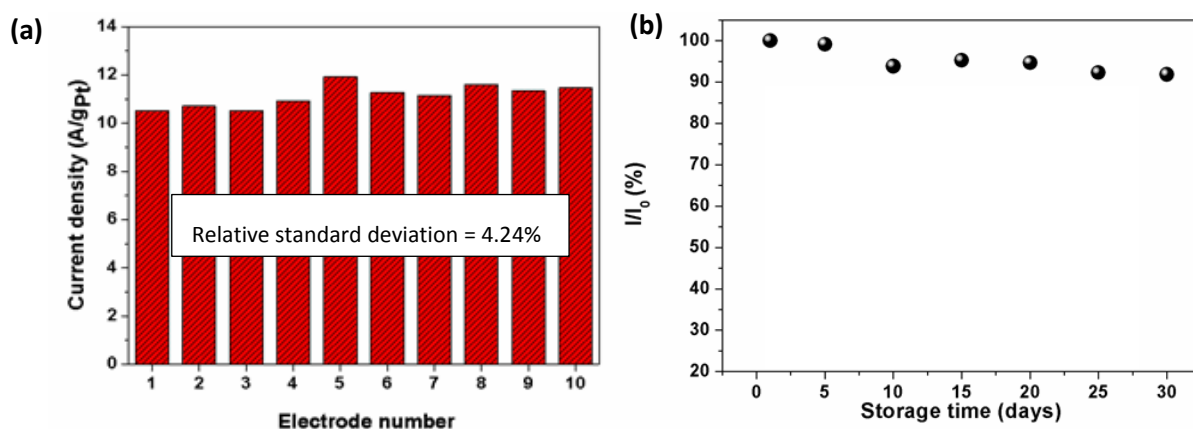

Figure S1 (a) Reproducibility of the current responses of 10 different Nafion/Au<sub>rod</sub>@Pt/GCE sensor electrodes to 6 mM glucose in 0.1 M PBS (pH= 7.4) containing 0.1 M KCl, at +0.20 V (vs. Ag/AgCl); (b) 30-day stability test, where the electrode was stored at room temperature in the dry state when not in use, test condition: 10 mM PBS (pH 7.4) containing 6 mM glucose and 100 mM KCl, at 0.2 V (vs. Ag/AgCl)

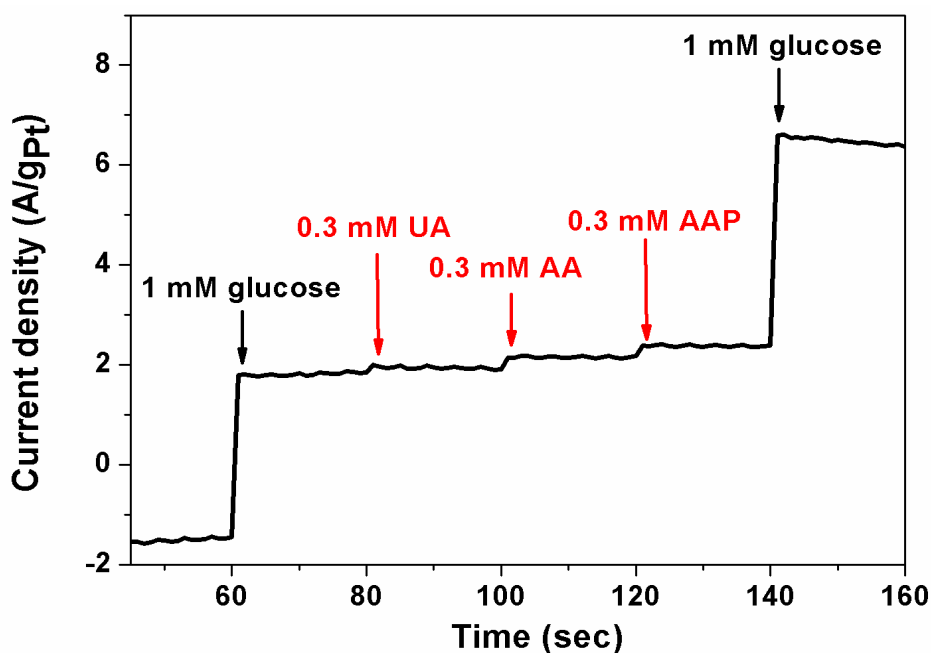

Figure S2. Interference tests for electroactive species (0.3 mM UA, AA, and AAP) tested in 0.1 M PBS (pH 7.4) containing 0.1 M KCl at +0.20 V (vs. Ag/AgCl).

A few Pt-based and bimetallic non-enzymatic glucose sensors published in recent years are summarized in Table R1. It is interesting to note that the sensitivity of reported sensors outperform most of the known methods for glucose sensing at a lower working potential. It shows the advantages of the bimetallic composite sensor brought by the carefully designed composition and morphology. The electron transfer effect mimics the role of an enzyme and the whole sensing platform can perform with significantly improved sensitivity, stability and selectivity.

**Table R1** List of recent platinum-based and bimetallic non-enzymatic glucose sensors

| Electrode composition                     | Sensitivity ( $\mu\text{A mM}^{-1} \text{cm}^{-2}$ ) | Linear range (mM) | LOD ( $\mu\text{M}$ ) | Working potential (vs. Ag/AgCl) | Medium              | Year | Ref.          |
|-------------------------------------------|------------------------------------------------------|-------------------|-----------------------|---------------------------------|---------------------|------|---------------|
| Nafion/dendritic Pt-Au NPs/GCE            | 31.17*                                               | 0.5-7.5           | 500 (tested limit)    | +0.2 V                          | 0.1 M PBS (pH 7.4)  | 2013 | This work     |
| Nation/dendritic Pt/GCE                   | 24.92*                                               | 0.5-5             | 500 (tested limit)    | +0.2 V                          | 0.1 M PBS (pH 7.4)  | 2013 | This work     |
| Pt nanoflowers electrode                  | 1.87                                                 | 1-16              | 48                    | +0.03 V                         | 0.2 M PBS (pH 7.0)  | 2012 | <sup>1</sup>  |
| Porous Pt-disk electrode                  | 25.2                                                 | 1-16              | N.A.                  | +0.35 V                         | 0.05 M PBS (pH 7.4) | 2011 | <sup>2</sup>  |
| Au-Pt hybrid                              | 39.53                                                | 1-20              | 25                    | +0.4 V                          | 0.1 M PBS (pH 7.4)  | 2011 | <sup>3</sup>  |
| Pt <sub>50</sub> Au <sub>50</sub> /MWCNTs | 10.71                                                | Up to 24.44       | 10                    | +0.3 V                          | PBS (pH 7.4)        | 2010 | <sup>4</sup>  |
| PtAu/C nanocomposites                     | 4.7                                                  | 0-10              | 2                     | +0.35 V                         | PBS (pH 7.4)        | 2010 | <sup>5</sup>  |
| Au <sub>95</sub> Ru <sub>5</sub> NPs      | 38.3                                                 | 0-15              | 269                   | -0.65 V                         | 0.1 M NaOH          | 2010 | <sup>6</sup>  |
| PtRu/MWCNTs/IL                            | 10.7                                                 | 0.2-15            | 50                    | -0.1 V vs SCE                   | 0.1 M PBS (pH 7.4)  | 2009 | <sup>7</sup>  |
| 3D Pt nanoporous                          | 642                                                  | 0.1-1.5           | N.A.                  | +0.4 V                          | 0.1 M PBS (pH 7.4)  | 2008 | <sup>8</sup>  |
| Pt nanoporous                             | 291.0                                                | 0-10              | N.A.                  | +0.4 V                          | 0.1 M PBS (pH 7.4)  | 2008 | <sup>9</sup>  |
| Dendritic Pt                              | 12.1                                                 | 1.0-20            | 1.2                   | +0.5 V                          | PBS (pH 7.4)        | 2008 | <sup>10</sup> |
| Nanoporous Pt                             | 7.75<br>0.83 (packaged sensor)                       | N.A.              | N.A.                  | +0.4 V                          | 0.1 M PBS (pH 7.4)  | 2008 | <sup>11</sup> |
| PtPb nanoporous networks                  | 10.8                                                 | 1-16.9            | N.A.                  | +0.4 V                          | 0.1 M PBS (pH 7.4)  | 2008 | <sup>12</sup> |

\*Derived from the sensitivity mentioned on p9/p10 times the loading amount mentioned on p6 in manuscript.

$$\text{Nafion/dendritic Pt-Au NPs/GCE: } 2.106 \text{ A mM}^{-1} \text{ gPt}^{-1} \times 1.48 \times 10^{-5} \text{ gPt/cm}^2 = 31.17 \mu\text{A mM}^{-1} \text{ cm}^{-2}$$

$$\text{Nation/dendritic Pt/GCE: } 0.670 \text{ A mM}^{-1} \text{ gPt}^{-1} \times 3.72 \times 10^{-5} \text{ gPt/cm}^2 = 24.92 \mu\text{A mM}^{-1} \text{ cm}^{-2}$$

## Reference

1. M.Q. Guo, H.S. Hong, X.N. Tang, H.D. Fang and X. H. Xu, *Electrochimica Acta*, 2012, 63, 1-8.
2. J. H. Shim, K. Jang, C. Lee and Y. Lee, *Electroanalysis*, 2011, 23, 2063-2069.
3. Y. J. Lee and J. Y. Park, *Sensors and Actuators B: Chemical*, 2011, 155, 134-139.
4. J. Ryu, K. Kim, H.-S. Kim, H.T. Hahn and D. Lashmore, *Biosensors and Bioelectronics*, 2010, 26, 602-607.
5. B. Singh, F. Laffir, T. McCormac and E. Dempsey, *Sensors and Actuators B: Chemical*, 2010, 150, 80-92.
6. Q. Yi, W. Yu and F. Niu, *Electroanalysis*, 2009, 22, 556-563.
7. F. Xiao, F. Zhao, D. Mei, Z. Mo and B. Zeng, *Biosensors and Bioelectronics*, 2009, 24, 3481-3486.
8. J.-F. Huang, *Electroanalysis*, 2008, 20, 2229-2234.
9. C.-H. Chou, J.-C. Chen, C.-C. Tai, I-W. Sun and J.-M. Zen, *Electroanalysis*, 2008, 20, 771-775.
10. Q. Shen, L. Jiang, H. Zhang, Q. Min, W. Hou and J.-J. Zhu, *Journal of Physical Chemistry C*, 2008, 12, 16385-16392.
11. Y. J. Lee, D. J. Park and J. Y. Park, *IEEE Sensors Journal* 2008, 8, 1922-1927.
12. J. Wang, D. F. Thomas and A. Chen, *Analytical Chemistry*, 2008, 80, 997-1004.
